# Supplementary material
Source: bioRxiv or medRxiv preprint supplement (https://www.biorxiv.org/highwire/filestream/63679/field_highwire_adjunct_files/0/209221-1.pdf)

Figure S1

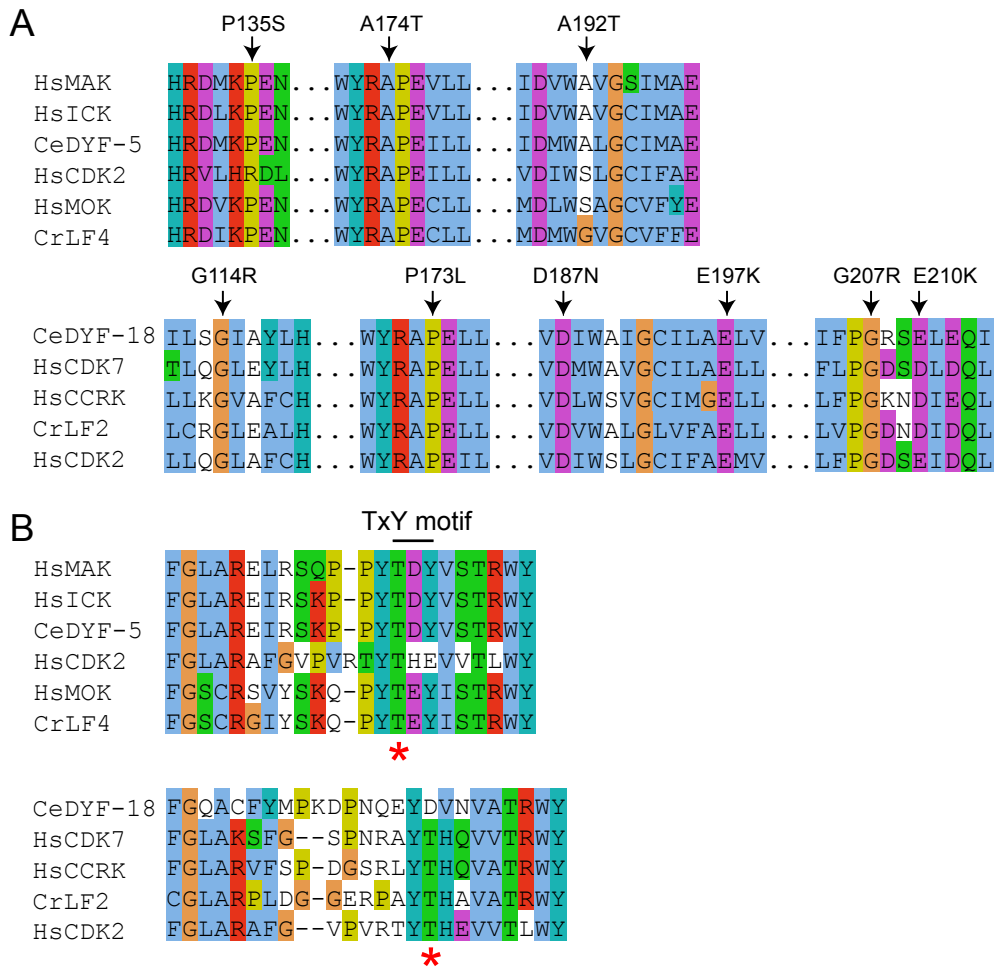

Supplement: Supplementary file [file 209221-1.pdf]
